# Supplementary material for: Change in Patient Activation and Mental Illness Symptoms After Communication Training: A Multisite Study With a Diverse Patient Sample
Source: Atypon-hosted journal article supplement (doi:10.1176/appi.ps.201800216), 2019-05-14
Supplement: appi.ps.201800216.ds001.pdf [file appi.ps.201800216.ds001.pdf]

**Comparison of baseline characteristics of patients and clinicians with no missing values in PAS and MH outcomes versus patients and clinicians with missing values**

|                        | PAS Time 2<br>missing vs no<br>missing |                   | PAS Time 3<br>missing vs no<br>missing |                   | PQH-9 Time 3<br>missing vs no<br>missing |                   | GAD-7 Time 3<br>missing vs no<br>missing |                   |
|------------------------|----------------------------------------|-------------------|----------------------------------------|-------------------|------------------------------------------|-------------------|------------------------------------------|-------------------|
|                        | $\chi^2$ or <i>t</i><br>Test           | <i>p</i><br>value | $\chi^2$ or <i>t</i><br>Test           | <i>p</i><br>value | $\chi^2$ or <i>t</i><br>Test             | <i>p</i><br>value | $\chi^2$ or <i>t</i><br>Test             | <i>p</i><br>value |
| <b>Patient Group</b>   |                                        |                   |                                        |                   |                                          |                   |                                          |                   |
| Sex                    | .04                                    | .84               | .60                                    | .44               | .59                                      | .44               | .43                                      | .51               |
| Age range              | 10.73                                  | .01               | 1.52                                   | .68               | .37                                      | .95               | .46                                      | .93               |
| Race/Ethnicity         | 2.73                                   | .44               | 1.43                                   | .70               | 3.16                                     | .37               | 2.74                                     | .43               |
| Language               | 1.44                                   | .70               | 1.67                                   | .64               | 2.11                                     | .55               | 2.32                                     | .51               |
| Region of origin       | 2.60                                   | .63               | .99                                    | .91               | 1.60                                     | .81               | 1.86                                     | .76               |
| Educational level      | 8.65                                   | .03               | 11.33                                  | .01               | 10.90                                    | .01               | 11.25                                    | .01               |
| Employment status      | .51                                    | .48               | .03                                    | .86               | .04                                      | .85               | .09                                      | .76               |
| Personal Income        | 4.54                                   | .34               | 8.21                                   | .08               | 6.24                                     | .18               | 6.27                                     | .18               |
| Patient Activation     | -0.49                                  | .62               | .42                                    | .68               | -0.16                                    | .87               | -0.24                                    | .81               |
| PHQ-9                  |                                        |                   |                                        |                   |                                          |                   |                                          |                   |
| Score (mean)           | .17                                    | .86               | .04                                    | .97               | .48                                      | .63               | .22                                      | .83               |
| GAD-7                  |                                        |                   |                                        |                   |                                          |                   |                                          |                   |
| Score (mean)           | .69                                    | .49               | -0.05                                  | .96               | .47                                      | .64               | .12                                      | .90               |
| <b>Clinician Group</b> |                                        |                   |                                        |                   |                                          |                   |                                          |                   |
| Sex                    | 1.08                                   | .30               | 3.00                                   | .08               | 2.62                                     | .11               | 2.62                                     | .11               |
| Age range              | 2.02                                   | .73               | 1.71                                   | .79               | 1.41                                     | .84               | 1.41                                     | .84               |
| Race/Ethnicity         | 1.37                                   | .71               | 2.51                                   | .47               | 2.53                                     | .47               | 2.53                                     | .47               |
| Language               | 2.30                                   | .51               | .77                                    | .86               | .75                                      | .86               | .75                                      | .86               |
| Region of origin       | 4.76                                   | .31               | 1.66                                   | .80               | 1.46                                     | .83               | 1.46                                     | .83               |
| Personal Income        | 2.70                                   | .61               | 1.22                                   | .88               | 1.19                                     | .88               | 1.19                                     | .88               |
| Specialty              | .33                                    | .96               | 4.03                                   | .26               | 3.06                                     | .38               | 3.06                                     | .38               |

*Note.*

In the Clinician Group, comparison is between the group of clinicians with patients with missing values, and the group of clinicians with patients without missing values. If a clinician has both type of patients, it is included in both groups.

### Simultaneous Equation Full Model Coefficients

|                                             | Coeff. | SE   | <i>p</i> value |
|---------------------------------------------|--------|------|----------------|
| <b>PAS Equation</b>                         |        |      |                |
| Constant                                    | 43.63  | 5.27 | 0.00           |
| <i>Patient Characteristics</i>              |        |      |                |
| GAD (Final Assessment)                      | -0.30  | .12  | .01            |
| PAS (Baseline)                              | .46    | .05  | 0.00           |
| Sex (Male Reference)                        |        |      |                |
| Female                                      | .46    | 1.31 | .72            |
| Age range (18-34 years-old reference)       |        |      |                |
| 35-49 years-old                             | 1.58   | 1.49 | .29            |
| 50-64 years-old                             | .40    | 1.54 | .79            |
| 65 + years-old                              | .68    | 2.32 | .77            |
| Race/Ethnicity (Non-Latino White Reference) |        |      |                |
| Latino                                      | 1.10   | 1.66 | .51            |
| Non-Latino black                            | 1.51   | 2.07 | .47            |
| Asian                                       | -0.26  | 2.36 | .91            |
| Educational level (0-6th Grade Reference)   |        |      |                |
| 7th-11th grade                              | -0.75  | 2.76 | .79            |
| 12th grade                                  | -0.58  | 2.90 | .84            |
| > 12th grade                                | -1.80  | 2.62 | .49            |
| <i>Clinician Characteristics</i>            |        |      |                |
| Sex (Male Reference)                        |        |      |                |
| Female                                      | -1.54  | 1.54 | .32            |
| Age range (18-34 years-old reference)       |        |      |                |
| 35-49 years-old                             | 1.26   | 1.49 | .40            |
| 50-64 years-old                             | -0.52  | 1.61 | .75            |
| 65 + years-old                              | -0.72  | 2.46 | .77            |
| Race/Ethnicity (Non-Latino White Reference) |        |      |                |
| Latino                                      | -0.42  | 1.65 | .80            |
| Non-Latino black                            | -0.15  | 2.61 | .95            |
| Asian                                       | 2.30   | 1.99 | .25            |
| <b>GAD Equation</b>                         |        |      |                |
| Constant                                    | 3.58   | 1.47 | .02            |
| Clinician Intervention/Dosage               | -1.57  | .67  | .02            |
| <i>Patient Characteristics</i>              |        |      |                |
| GAD (Baseline)                              | .57    | .05  | 0.00           |
| Sex (Male Reference)                        |        |      |                |
| Female                                      | -0.74  | .55  | .18            |
| Age range (18-34 years-old reference)       |        |      |                |
| 35-49 years-old                             | -0.17  | .63  | .78            |
| 50-64 years-old                             | -0.92  | .65  | .16            |

|                                             |       |      |      |
|---------------------------------------------|-------|------|------|
| 65 + years-old                              | -0.79 | .97  | .42  |
| Race/Ethnicity (Non-Latino White Reference) |       |      |      |
| Latino                                      | .62   | .69  | .37  |
| Non-Latino black                            | -1.02 | .86  | .24  |
| Asian                                       | .22   | .99  | .83  |
| Educational level (0-6th Grade Reference)   |       |      |      |
| 7th-11th grade                              | -0.95 | 1.16 | .41  |
| 12th grade                                  | -0.54 | 1.21 | .66  |
| > 12th grade                                | -0.30 | 1.10 | .79  |
| <i>Clinician Characteristics</i>            |       |      |      |
| Sex (Male Reference)                        |       |      |      |
| Female                                      | 0.00  | .65  | 1.00 |
| Age range (18-34 years-old reference)       |       |      |      |
| 35-49 years-old                             | .37   | .63  | .56  |
| 50-64 years-old                             | -0.05 | .68  | .94  |
| 65 + years-old                              | 1.34  | 1.03 | .20  |
| Race/Ethnicity (Non-Latino White Reference) |       |      |      |
| Latino                                      | .32   | .69  | .64  |
| Non-Latino black                            | .24   | 1.09 | .82  |
| Asian                                       | -1.88 | .82  | .02  |

*Note.*

All analyses and significant tests were adjusted for multiple imputation and small sample size.
